# Supplementary material for: Protective immune trajectories in early viral containment of non-pneumonic SARS-CoV-2 infection
Source: PubMed Central journal article supplement (PMC8866527; doi:10.1038/s41467-022-28508-0), 2022-02-23
Supplement: 41467_2022_28508_MOESM1_ESM.pdf [file 41467_2022_28508_MOESM1_ESM.pdf]

## Supplementary File

### Protective immune trajectories in early viral containment of non-pneumonic SARS-CoV-2 infection

Kami Pekayvaz<sup>1,2,#,\*</sup>, Alexander Leunig<sup>1,2,#</sup>, Rainer Kaiser<sup>1,2</sup>, Markus Joppich<sup>3</sup>, Sophia Brambs<sup>1</sup>, Aleksandar Janjic<sup>4</sup>, Oliver Popp<sup>5</sup>, Daniel Nixdorf<sup>6,7</sup>, Valeria Fumagalli<sup>8, 9</sup>, Nora Schmidt<sup>10</sup>, Vivien Polewka<sup>1</sup>, Afra Anjum<sup>1</sup>, Viktoria Knottenberg<sup>1</sup>, Luke Eivers<sup>1</sup>, Lucas E. Wange<sup>4</sup>, Christoph Gold<sup>1</sup>, Marieluise Kirchner<sup>5</sup>, Maximilian Muenchhoff<sup>11,12,13</sup>, Johannes C. Hellmuth<sup>7,13</sup>, Clemens Scherer<sup>1,2,13</sup>, Raquel Rubio-Acero<sup>12,14</sup>, Tabea Eser<sup>12,14</sup>, Flora Deák<sup>12,14</sup>, Kerstin Puchinger<sup>14</sup>, Niklas Kuhl<sup>15,16</sup>, Andreas Linder<sup>15,16</sup>, Kathrin Saar<sup>5</sup>, Lukas Tomas<sup>1,2</sup>, Christian Schulz<sup>1,2</sup>, Andreas Wieser<sup>12,14</sup>, Wolfgang Enard<sup>4</sup>, Inge Kroidl<sup>12,14</sup>, Christof Geldmacher<sup>12,14</sup>, Michael von Bergwelt-Baildon<sup>7,13</sup>, Oliver T. Keppler<sup>11,12,13</sup>, Mathias Munschauer<sup>10</sup>, Matteo Iannacone<sup>8, 9, 17</sup>, Ralf Zimmer<sup>3</sup>, Philipp Mertins<sup>5</sup>, Norbert Hubner<sup>5</sup>, Michael Hoelscher<sup>12,14</sup>, Steffen Massberg<sup>1,2</sup>, Konstantin Stark<sup>1,2,§,\*</sup>, Leo Nicolai<sup>1,2,§,\*</sup>

#### Affiliations

- 1 Medizinische Klinik und Poliklinik I University Hospital Ludwig-Maximilian University Munich, Germany
  - 2 DZHK (German Centre for Cardiovascular Research), partner site Munich Heart Alliance, Germany
  - 3 Department of Informatics, Ludwig-Maximilian Universität München, Germany
  - 4 Anthropology and Human Genomics, Faculty of Biology, Ludwig-Maximilians University Munich
  - 5 Max Delbrück Center for Molecular Medicine (MDC) and Berlin Institute of Health (BIH), Berlin, Germany
  - 6 Laboratory for Translational Cancer Immunology, Gene Center, LMU Munich, Munich, Germany
  - 7 Medizinische Klinik und Poliklinik III, University Hospital Ludwig-Maximilian University Munich, Germany
  - 8 Division of Immunology, Transplantation and Infectious Diseases, IRCCS San Raffaele Scientific Institute, 20132 Milan, Italy
  - 9 Vita-Salute San Raffaele University, 20132 Milan, Italy
  - 10 Helmholtz Institute for RNA-based Infection Research, Helmholtz-Center for Infection Research, Würzburg, Germany
  - 11 Max von Pettenkofer Institute & GeneCenter, Virology, Faculty of Medicine, LMU München, Munich, Germany
  - 12 German Center for Infection Research (DZIF), Partner Site Munich
  - 13 COVID-19 Registry of the LMU Munich (CORKUM), University Hospital, LMU Munich
  - 14 Division of Infectious Diseases and Tropical Medicine, University Hospital Ludwig-Maximilian University Munich, Germany
  - 15 Gene Center and Department of Biochemistry, University Hospital Ludwig-Maximilian University Munich, Germany
  - 16 Medizinische Klinik und Poliklinik II, University Hospital Ludwig-Maximilian University Munich, Germany
  - 17 Experimental Imaging Centre, IRCCS San Raffaele Scientific Institute, 20132 Milan, Italy
- # Contributed equally  
§ Jointly supervised this work  
\* Correspondence to: [kami.pekayvaz@med.uni-muenchen.de](mailto:kami.pekayvaz@med.uni-muenchen.de), [konstantin.stark@med.uni-muenchen.de](mailto:konstantin.stark@med.uni-muenchen.de) or [leo.nicolai@med.uni-muenchen.de](mailto:leo.nicolai@med.uni-muenchen.de)

# Supplementary Figures

Suppl Fig 1

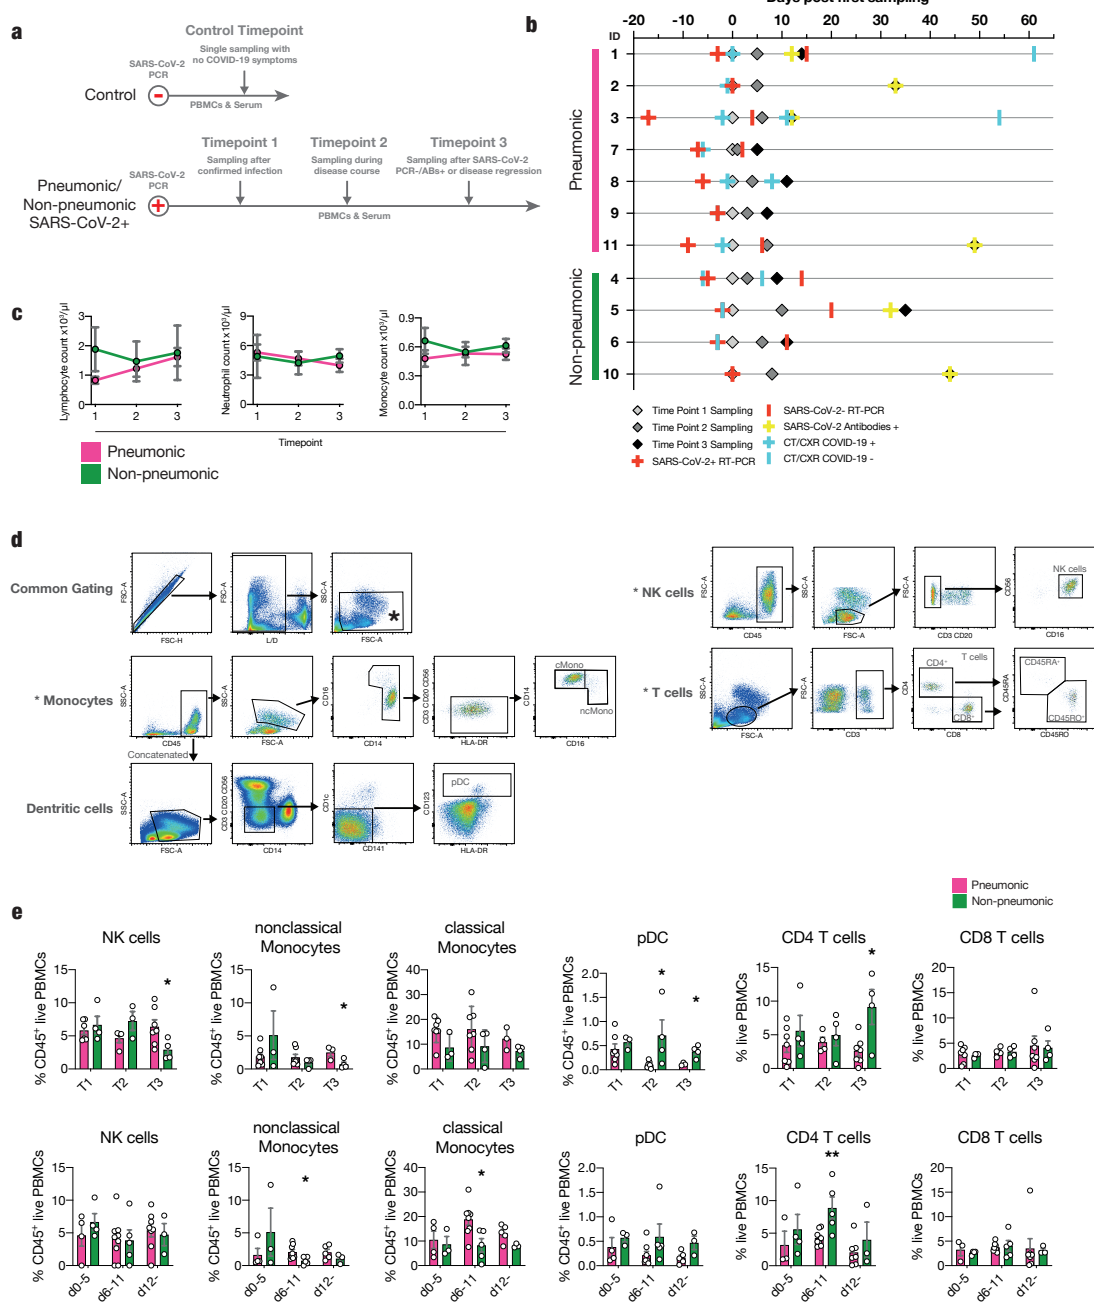

**Suppl. Fig. 1 | a:** Schematic of exploratory cohort and sampling time points. **b:** Timeline of the exploratory group normalized by the first sampling time point (day=0). Sampling time points, positive and negative real time polymerase chain reaction (RT-PCR) for SARS-CoV-2, positive and negative COVID-19 in chest tomography/chest x-ray and positive SARS-CoV-2 antibody detection are shown for n=7 pneumonic and n=4 non-pneumonic patients. **c:** Longitudinal blood lymphocyte, neutrophil and monocyte counts at time points 1-3 of n=7 pneumonic and n=3 non-pneumonic COVID-19 patients per time point. No statistical testing performed, mean±sem. Exact n numbers per time point are shown in the source data. **d:** Gating strategies for flow-cytometric characterization of PBMCs. Common gating strategy until \* is shown in the top row. Further gating strategy is shown for the respective cell population. For dendritic cells, all samples were gated together as a concatenated file. **e:** Percentage of immune cells as live CD45<sup>+</sup> cells/PBMCs measured by flow cytometry per sampling time point (top) and binned according to days after SARS-CoV-2 PCR+ (bottom). Two-sided t-test, n≥3 per time point and group, mean±sem. Exact n numbers per time point are shown in the source data. \*p<0.05, \*\*p<0.01. Source data are provided as a Source Data file.

Suppl Fig 2

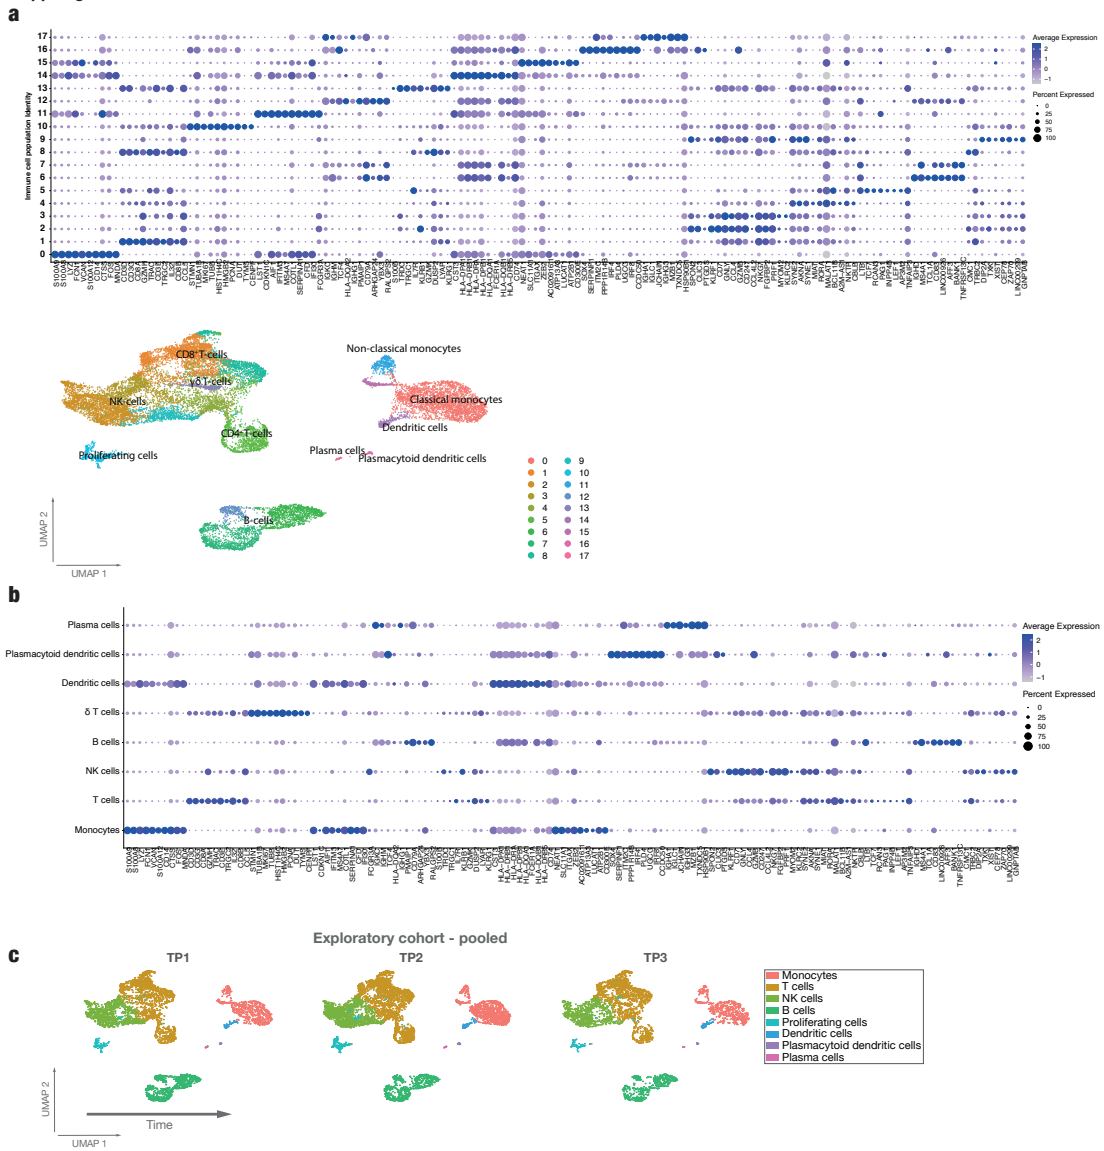

Suppl. Fig. 2 | **a:** Dot-plot of cluster defining markers for the scRNA-seq data. **b:** Dot-plot of population defining markers for the scRNA-seq data as shown in Figure 1g. **c:** UMAP representation of the exploratory cohort samples showing the assigned cell populations per sampling time point.



Suppl Fig 4

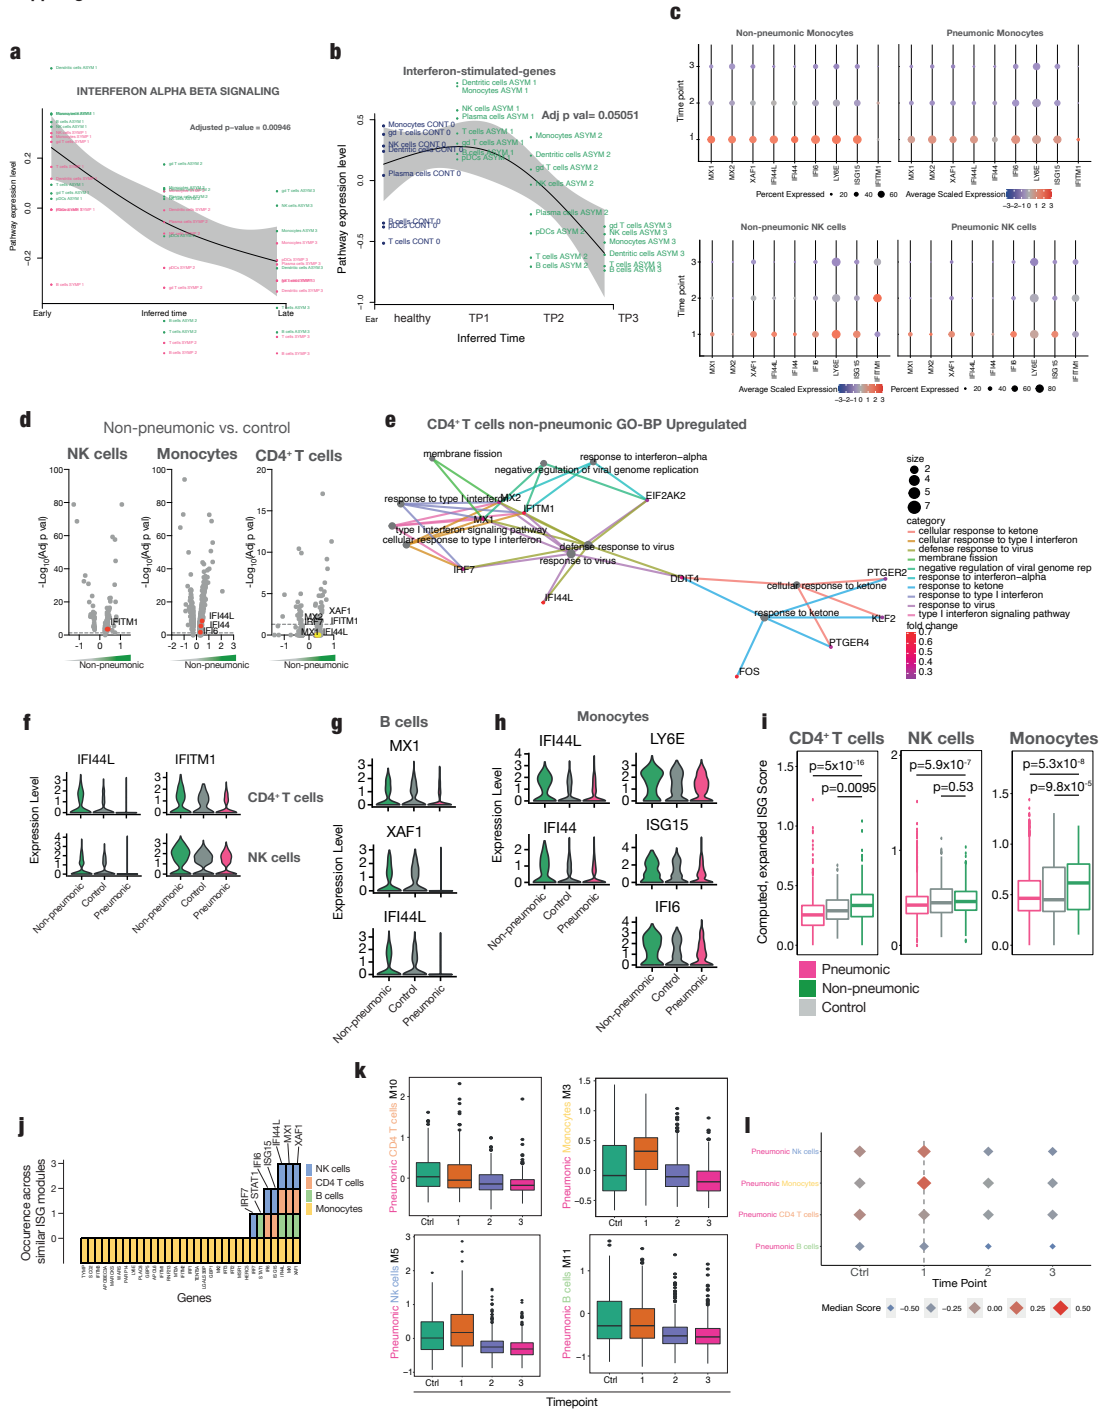

**Suppl. Fig. 4 | a:** Tempora analysis reveals significant temporal regulation of “Interferon alpha beta signaling” throughout the disease course in non-pneumonic (ASYM) and pneumonic (SYM) subjects, gray area is 95% confidence interval, statistical test conducted with Tempora method. **b:** Longitudinal behavior of predefined ISGs (further depicted in methods) in non-pneumonic patients analysed by Tempora, gray area is 95% confidence interval, statistical test conducted with Tempora method. **c:** Dot-plot of interferon stimulated gene expression and Percent expressing cells in monocytes and NK cells per time point in non-pneumonic and pneumonic patients. **d:** Volcano plot of differentially regulated genes in CD4+ T cells, NK cells and monocytes of non-pneumonic compared to control samples. Red annotations are significantly upregulated (adj p val<0.05). Positive fold change signifies higher expression in the non-pneumonic group. Line denotes adj p val<0.05. Statistical tests for volcano plots described in methods. **e:** GO-BP network analysis of pathways upregulated in CD4+ T cells of non-pneumonic samples compared to pneumonic samples. **f-h:** Violin plots of expression of interferon stimulated in CD4+ T cells, NK cells, C cells and monocytes for pneumonic, non-pneumonic and control samples. **i:** Box plots of expanded ISG-scores (see methods) of CD4+ T cells (n= 725 pneumonic n=388 non- pneumonic and n=162 control cells), NK cells (n= 2550 pneumonic n=888 non- pneumonic and n=903 control cells) and monocytes (n= 1713 pneumonic n=380 non- pneumonic and n=1303 control cells). P-values are shown above, non-pneumonic with pneumonic and control with pneumonic are compared (median, IQR and 1.5IQR), unpaired, two-sided t-tests. **j:** Number of identical occurrence of genes of ISG GMs of pneumonic patients in four immune cell

subsets. **k**: Box-plots showing temporal development of the specific ISG-GMs in pneumonic patients. CD4 T cells n=162,176,347 and 202 per TP respectively, monocytes n=1303,455,796 and 462 per TP respectively, NK cells n=903,749,1038 and 763 per TP respectively and B cells n=440,623,452 and 398 per TP respectively. Box-and-whiskers plot (median, IQR and 1.5IQR). **l**: Dot plots displaying the median score of respective ISG-modules of NK-cells, Monocytes, CD4 T cells, B cells throughout time in pneumonic patients and in control patients. Source data are provided as a Source Data file.

Suppl Fig 5

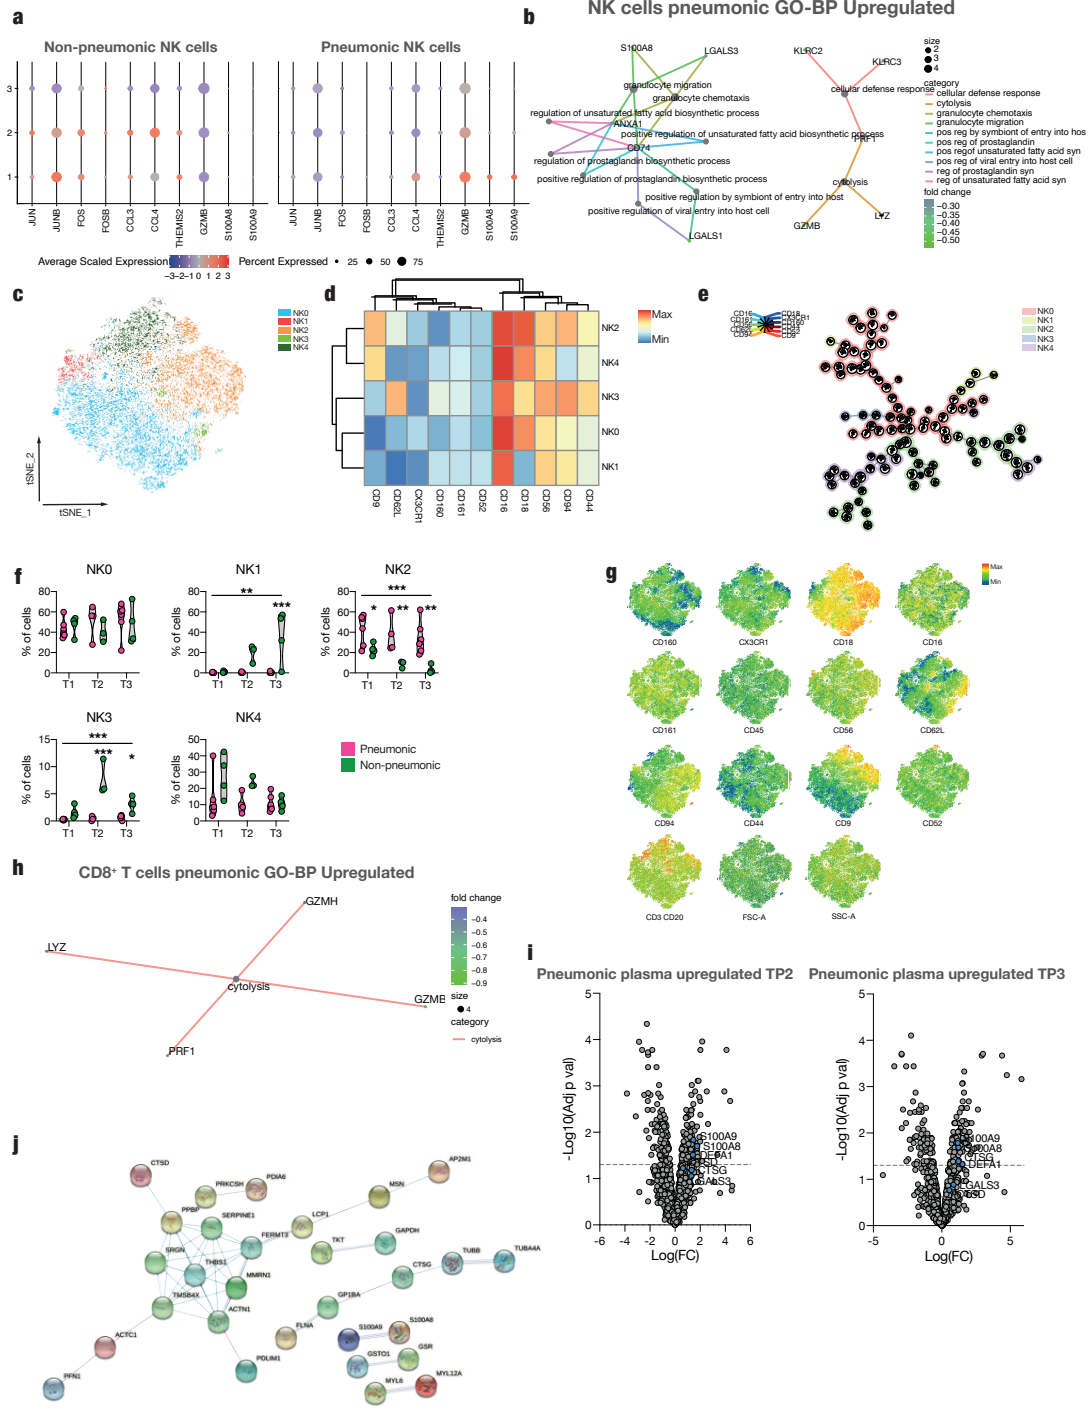

**Suppl. Fig. 5 | a**: Dot-plot of the scaled average expression and percent expressing cells of selected genes in NK cells by sampling time point in non-pneumonic and pneumonic patients. **b**: GO-BP network analysis of pathways upregulated in NK cells of pneumonic samples compared to non-pneumonic samples. **c**: tSNE of NK cells measured by flow cytometry. FlowSOM assigned clusters are shown in different colors. **d**: Heat map of surface marker expression by FlowSOM group. **e**: FlowSOM self-organizing map of NK cells. **f**: Violin plots of Percentage of NK cells in each FlowSOM cluster per time point. Statistical significance:

Mixed-effects model analysis. Lines denote significant time effect, post-hoc Sidak's multiple comparisons test for individual significant differences between pneumonic and non-pneumonic samples per time point.  $n \geq 3$  per time point and group. Exact  $n$  numbers per time point are shown in the source data. **g**: tSNE with expression for individual surface makers of NK cells. **h**: GO-BP network analysis of pathways enriched in CD8<sup>+</sup> T cells of pneumonic samples compared to non-pneumonic samples. **i**: Volcano plots of differentially expressed plasma proteins at TP2-3 of pneumonic samples compared to control samples. Line denotes adj  $p$  val < 0.05. Statistical tests for volcano plots described in methods. **j**: String network of top upregulated proteins in pneumonic plasma samples. \* $p < 0.05$ , \*\* $p < 0.01$ , \*\*\* $p < 0.001$ . Source data are provided as a Source Data file.

Suppl Fig 6

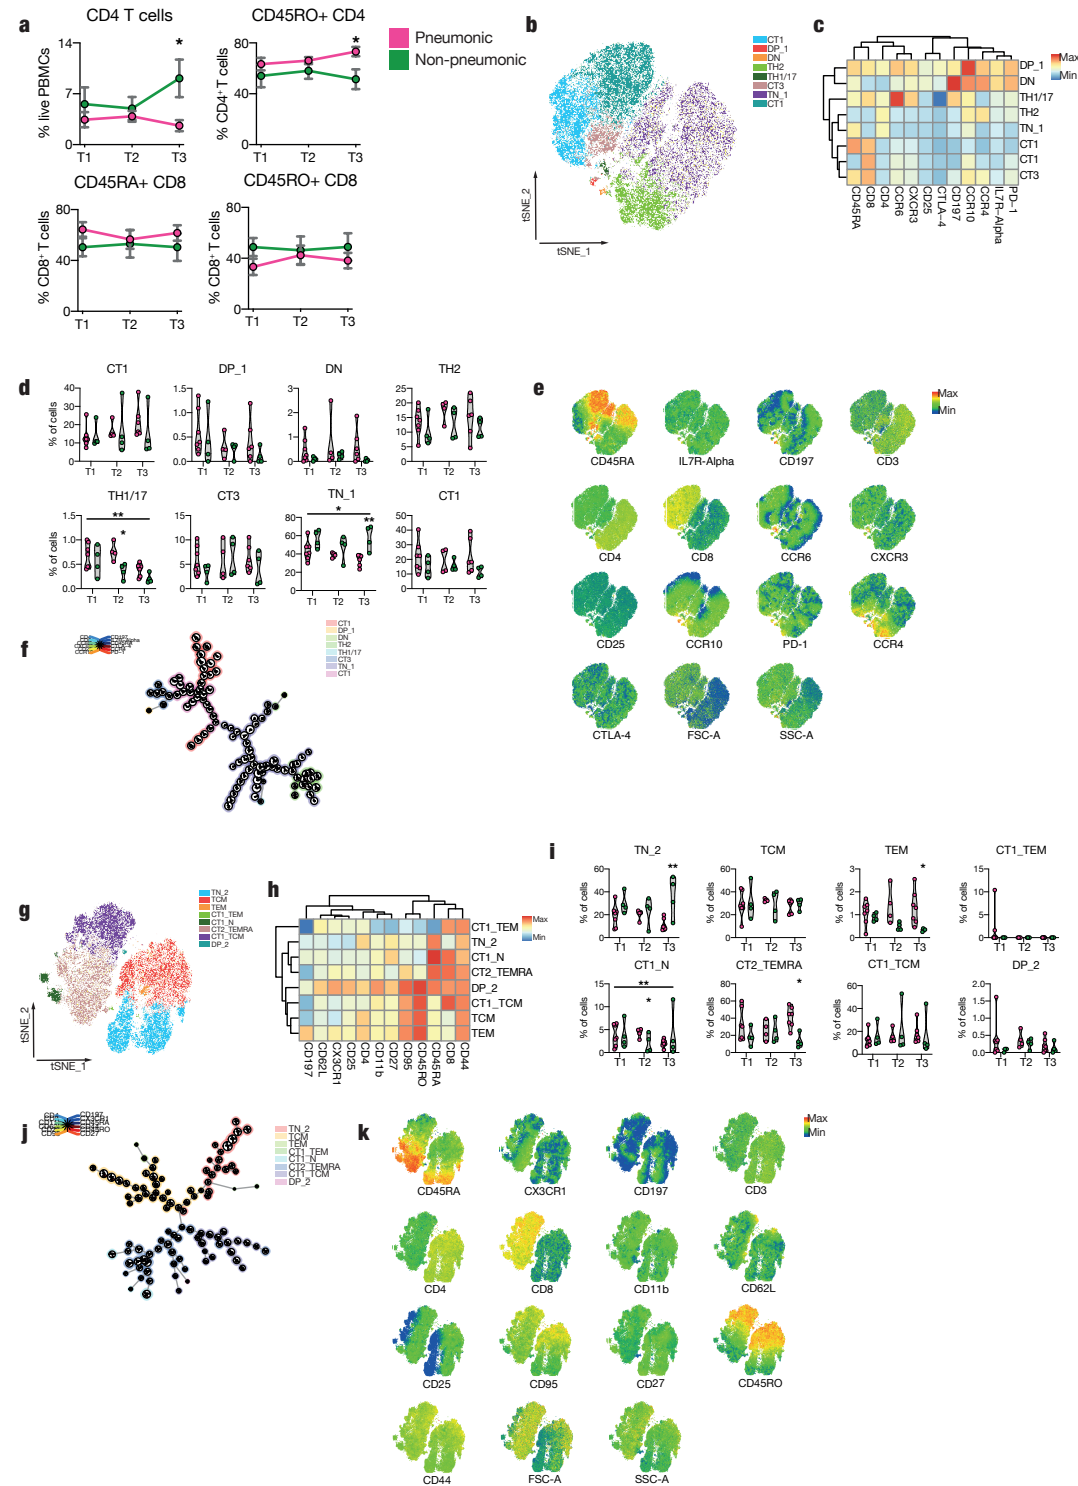

Suppl. Fig. 6 | a: Percentage of CD4<sup>+</sup> and CD45RA/RO<sup>±</sup> CD8<sup>+</sup> / CD4<sup>+</sup> T cells of live PBMCs measured by flow cytometry per sampling time point. Two-sided t-test,  $n \geq 3$  per time point and group. Exact  $n$  numbers per time point are shown in the source

data. **b**: tSNE of T cells (T cell panel 1) measured by flow cytometry. FlowSOM assigned clusters are shown in different colors. **c**: Heat map of surface marker expression by FlowSOM group. **d**: Violin plots of Percentage of T cells in each FlowSOM cluster per time point. Mixed-effects model analysis. Lines denote significant time effect, post-hoc Sidak's multiple comparisons test for individual significant differences between pneumonic and non-pneumonic samples per time point.  $n \geq 4$  per time point and group. **e**: tSNE with expression for individual surface makers of T cells. **f**: FlowSOM self-organizing map of T cells. **g**: tSNE of T cells (T cell panel 2) measured by flow cytometry. FlowSOM assigned clusters are shown in different colors. **h**: Heat map of surface marker expression by FlowSOM group. **i**: Violin plots of Percentage of T cells in each FlowSOM cluster per time point. Mixed-effects model analysis. Lines denote significant time effect, post-hoc Sidak's multiple comparisons test for individual significant differences between pneumonic and non-pneumonic samples per time point.  $n \geq 4$  per time point and group. Exact n numbers per time point are shown in the source data. **j**: FlowSOM self-organizing map of T cells (T cell panel 2). **k**: tSNE with expression for individual surface makers of T cells (T cell panel 2). All error bars are mean  $\pm$  s.e.m. unless otherwise noted. \* $p < 0.05$ , \*\* $p < 0.01$ . Source data are provided as a Source Data file.

Suppl Fig 7

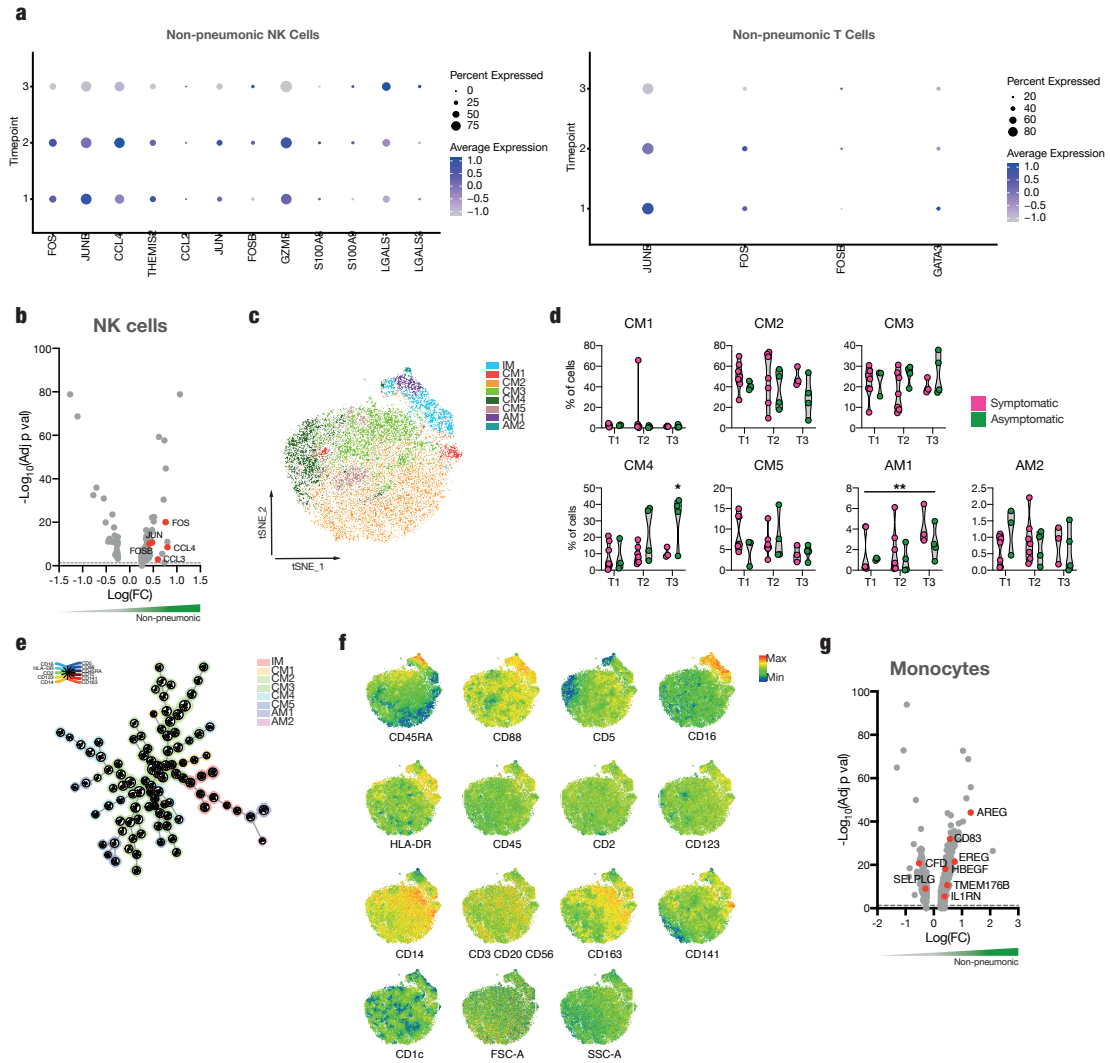

**Suppl. Fig. 7 | a**: Dot-plot of selected gene expression and percent expressing cells in non-pneumonic and pneumonic NK and T cells per time point. **b**: Volcano plot of differentially up- and downregulated genes in NK cells of non-pneumonic compared to control samples. Red annotations are significantly upregulated adj p val < 0.05. Positive fold change signifies higher expression in the non-pneumonic group. Line denotes adj p val < 0.05. **c**: tSNE of monocytes measured by flow cytometry. FlowSOM assigned clusters are shown in different colors. **d**: Violin plots of Percentage of monocytes in each FlowSOM cluster per time point. Mixed-effects model analysis. Lines denote significant time effect, post-hoc Sidak's multiple comparisons test for individual significant differences between pneumonic and non-pneumonic samples per time point.  $n \geq 3$  per time point and group. Exact n numbers per time point are shown in the source data. **e**: FlowSOM self-organizing map of monocytes **f**: tSNE with expression for individual surface makers of monocytes. **g**: Volcano plot of differentially up- and downregulated genes in monocytes of non-pneumonic compared to control samples. Red annotations are significantly upregulated adj p val < 0.05. Positive fold change signifies higher expression in the non-pneumonic group. Line denotes adj p val < 0.05. Statistical tests for volcano plots described in methods. \* $p < 0.05$ , \*\* $p < 0.01$ . Source data are provided as a Source Data file.



Suppl Fig 8

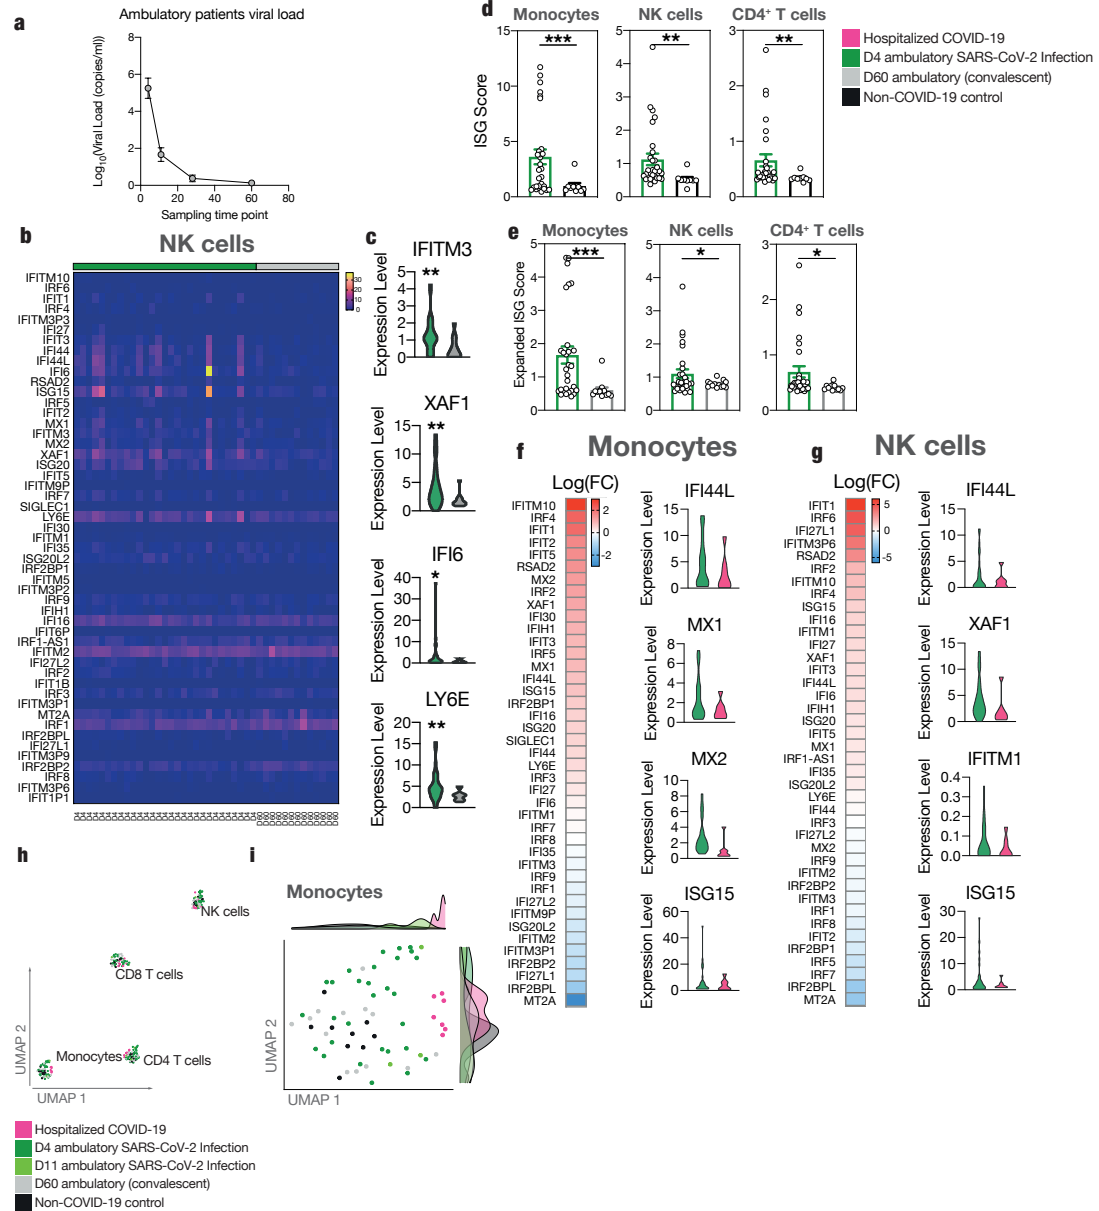

**Suppl. Fig. 8 | a:** Longitudinal viral load course of  $n=29$  ambulatory patients that were used for leukocyte subset RNA-sequencing.  $\text{Log}_{10}(\text{Viral Load (copies/ml)})$  is depicted at sampling time points day 4, 11, 28 and 60 post positive SARS-CoV-2 PCR. Mean  $\pm$  sem. **b:** Heat map of differentially expressed interferon stimulated genes in NK cells of day 4 ambulatory compared to day 60 (convalescent) SARS-CoV-2 infection. **c:** Individual ISG expressions of exemplary ISGs. Unpaired two-sided t-test with Welch's correction.  $n=29$  d4,  $n=13$  d60. **d:** Computed ISG scores for monocytes, NK cells and CD4<sup>+</sup> T cells. **e:** Computed, expanded ISG scores (see methods) for monocytes, NK cells and CD4<sup>+</sup> T cells. **d-e:** Unpaired two-sided t-test with Welch's correction.  $n=29$  d4,  $n=9$  non-COVID-19 controls. **f-g:** Heat maps of differentially expressed interferon stimulated genes in leukocyte subsets (monocytes and NK cells) of day 4 ambulatory compared to severe hospitalized COVID-19. Monocytes:  $n=28$  upregulated,  $n=16$  downregulated, NK cells:  $n=25$  upregulated,  $n=15$  downregulated. Individual ISG expressions of exemplary ISGs shown.  $n=29$  d4,  $n=7$  hospitalized. **h:** UMAP depicting single RNA-Seq samples and differentiating different disease severities / timepoints by color. **i:** UMAP further depicting single RNA-Seq monocyte samples, differentiating disease severities / timepoints by color. Mean  $\pm$  sem is shown unless otherwise specified. \* $p<0.05$ , \*\* $p<0.01$ , \*\*\* $p<0.001$ . Source data are provided as a Source Data file.

Suppl Fig 9

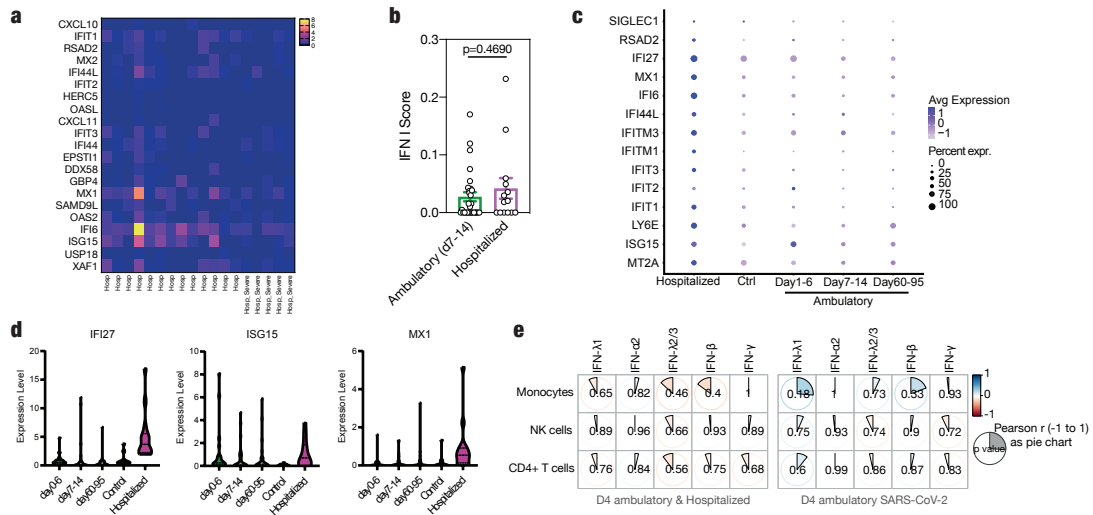

**Suppl. Fig. 9 | a:** Heat map of nasal swab interferon stimulated genes of the ISG score in Fig 7b. (n=13 hospitalized, n=5 severe hospitalized, n=5 non-ICU patients, see methods). **b:** IFN-I score in ambulatory and hospitalized patients. Unpaired two-sided t-test with Welch's correction. **c:** Dot-plot of ISGs across nasal swabs of hospitalized and ambulatory patients and control subjects. **d:** Individual ISG expressions of exemplary ISGs, d0-6 n=20, d7-14 n=29, d60-d95 n=28, controls n=10, hospitalized n=10, hospitalized n=14. **e:** Pearson correlation between the five measured interferon levels and ISG scores of monocytes, NK cells and CD4<sup>+</sup> T of day 4 ambulatory COVID-19 patients and hospitalized COVID-19 patients (pooled and day 4 of ambulatory patients alone). P value is shown in center of each field (none <0.05). Pie charts show Pearson's r from maximum 1 (clockwise and blue) to -1 (anticlockwise and red). n=27 day 4 and n=7 hospitalized COVID-19. Mean  $\pm$  sem is shown unless otherwise specified. Source data are provided as a Source Data file.

## Supplementary Tables

**Supplementary Table 1: WHO grade equivalent of cohorts**

| Cohort              | Group                                     | Description                                                                      | Equivalent WHO Grade |
|---------------------|-------------------------------------------|----------------------------------------------------------------------------------|----------------------|
| Exploratory Cohort  | Non-pneumonic                             | SARS-CoV-2+ patients without any pulmonary symptoms or radiological infiltrates. | 3-4                  |
| Exploratory Cohort  | Pneumonic                                 | SARS-CoV-2+ patients with confirmed COVID-19 associated pneumonia                | 3-4                  |
| Exploratory Cohort  | Control                                   | SARS-CoV-2- patients                                                             | 0                    |
| Confirmation Cohort | Ambulatory d0-14                          | Ambulatory SARS-CoV-2+ patients                                                  | 1-2                  |
| Confirmation Cohort | Hospitalized (without subdifferentiation) | SARS-CoV-2+ patients on a general hospital ward without major symptoms           | 3-4                  |
| Confirmation Cohort | Hospitalized_mild                         | SARS-CoV-2+ patients on a general hospital ward without major symptoms           | 3-4                  |
| Confirmation Cohort | Hospitalized_severe                       | SARS-CoV-2+ hospitalized patients with severe disease (see methods)              | 4-5                  |
| Confirmation Cohort | Ambulatory d60-95                         | Ambulatory SARS-CoV-2+ patients after reconvalescence                            | 0                    |
| Confirmation Cohort | Control                                   | Ambulatory control patients (healthy individuals)                                | 0                    |

**Table 2: Viral loads of cohorts**

| Cohort              | Group         | Timepoint/batch | log <sub>10</sub> (viral load) Median [IQR] |
|---------------------|---------------|-----------------|---------------------------------------------|
| Confirmation cohort | Hospitalized  | d5              | 5.7 [IQR: 3.1, 7.0]                         |
| Confirmation cohort | Ambulatory    | d4              | 5.6 [IQR: 3.1, 7.0]                         |
| Confirmation cohort | Ambulatory    | d11             | 1.0 [IQR: 0, 3.3]                           |
| Confirmation cohort | Ambulatory    | d28             | 0.0 [IQR: 0.0, 0.0]                         |
| Confirmation cohort | Ambulatory    | d60             | 0.0 [IQR: 0.0, 0.0]                         |
| Nasal swabs         | Hospitalized  | All (day7-14)   | 4.8 [IQR: 3.8, 6.5]                         |
| Nasal swabs         | Hospitalized  | severe only     | 6.1 [IQR: 4.5, 6.3]                         |
| Nasal swabs         | Hospitalized  | normal only     | 4.1 [IQR: 3.8, 7.1]                         |
| Nasal swabs         | Ambulatory    | day 0-6         | 8.3 [IQR: 5.3, 8.8]                         |
| Nasal swabs         | Ambulatory    | day 7-14        | 4.7 [IQR: 3.3, 6.5]                         |
| Nasal swabs         | Ambulatory    | day 60-95       | 0.0 [IQR: 0.0, 0.0]                         |
| Exploratory cohort  | Pneumonic     | Viral Load TP1  | 4.3 [IQR: 3.8, 5.3]                         |
| Exploratory cohort  | Pneumonic     | Viral Load TP2  | 3.0 [IQR: 2.8, 3.8]                         |
| Exploratory cohort  | Pneumonic     | Viral Load TP3  | 2.7 [IQR: 1.8, 3.2]                         |
| Exploratory cohort  | Non-pneumonic | Viral Load TP1  | 5.2 [IQR: 3.0, 7.6]                         |
| Exploratory cohort  | Non-pneumonic | Viral Load TP2  | 3.7 [IQR: 3.0, 5.1]                         |
| Exploratory cohort  | Non-pneumonic | Viral Load TP3  | 2.7 [IQR: 1.3, 3.0]                         |

**Supplementary Table 3: Monocyte Panel – subset descriptions**

| Description           | Name |
|-----------------------|------|
| Intermediate Monocyte | IM   |
| Classical Monocyte    | CM1  |
| Classical Monocyte    | CM2  |
| Classical Monocyte    | CM3  |
| Classical Monocyte    | CM4  |
| Classical Monocyte    | CM5  |
| Alternative Monocyte  | AM1  |
| Alternative Monocyte  | AM2  |

**Supplementary Table 4: T cell panel 1 – subset descriptions**

| Description            | Name   |
|------------------------|--------|
| Cytotoxic CD8 TC       | CT1    |
| double positive TC     | DP_1   |
| double negative TC     | DN     |
| TH2 CD4 TC             | TH2    |
| TH1/17 CD4 TC          | TH1/17 |
| naive cytotoxic CD8 TC | CT3    |
| naive CD4 TC           | TN_1   |
| cytotoxic CD8 TC       | CT1    |

**Supplementary Table 5: T Cell Panel 2 – subset descriptions**

| Description                      | Name      |
|----------------------------------|-----------|
| naive CD4 TC                     | TN_2      |
| central memory CD4 TC            | TCM       |
| effector memory CD4 TC           | TEM       |
| cytotoxic effector memory CD8 TC | CT1_TEM   |
| cytotoxic naive CD8 TC           | CT1_N     |
| cytotoxic TEMRA CD8 TC           | CT2_TEMRA |
| cytotoxic central memory CD8 TC  | CT1_TCM   |
| double positive TC               | DP_2      |

**Supplementary Table 6: NK Cell Panel - Antibodies used**

| Color       | Antigen    | Company & Cat #   |
|-------------|------------|-------------------|
| BV650       | CD45       | BioLegend #304044 |
| FITC        | CD94       | BioLegend #305504 |
| PE          | CD3        | BioLegend #300308 |
| PE          | CD20       | BioLegend #302306 |
| PERCP-Cy5.5 | CD44 (RAT) | BioLegend #103032 |

|           |              |                   |
|-----------|--------------|-------------------|
| APC       | CD160        | BioLegend #341208 |
| APC-Cy7   | CX3CR1 (RAT) | BioLegend #341616 |
| BV 605    | CD161        | BioLegend #339916 |
| BV785     | CD62L        | BioLegend #304830 |
| BV510     | CD16         | BioLegend #302048 |
| BV 711    | CD56         | BioLegend #362542 |
| AF 700    | CD18         | BioLegend #302124 |
| PE-Dazzle | CD52         | BioLegend #316014 |
| PE-Cy7    | CD9          | BioLegend #312116 |

**Supplementary Table 7: Monocyte Panel - Antibodies used**

| Color       | Antigen | Company & Cat #        |
|-------------|---------|------------------------|
| BV650       | CD45    | BioLegend #304044      |
| FITC        | CD14    | BD Biosciences #557153 |
| PE          | CD3     | BioLegend #300308      |
| PE          | CD20    | BioLegend #302306      |
| PE          | CD56    | BioLegend #304606      |
| PERCP-Cy5.5 | CD1c    | BioLegend #331514      |
| APC         | CD45RA  | BioLegend #304112      |
| APC-Cy7     | CD88    | BioLegend #344316      |
| BV 605      | HLA-DR  | BioLegend #307640      |
| BV785       | CD123   | BioLegend #306032      |
| BV510       | CD16    | BioLegend #302048      |
| BV 711      | CD2     | BioLegend #300232      |
| AF 700      | CD5     | BioLegend #364026      |

**Supplementary Table 8: T Cell Panel 1- Antibodies used**

| Color       | Antigen        | Company & Cat #   |
|-------------|----------------|-------------------|
| BV650       | CD8            | BioLegend #344730 |
| FITC        | CD25           | BioLegend #302604 |
| PE          | CCR10          | BioLegend #341504 |
| PERCP-Cy5.5 | CD152 (CTLA-4) | BioLegend #369608 |
| APC         | CD45RA         | BioLegend #304112 |
| APC-Cy7     | CD127 (IL7Ra)  | BioLegend #135040 |
| BV605       | CD4            | BioLegend #317438 |
| BV785       | CXCR3          | BioLegend #353738 |
| BV510       | CD3            | BioLegend #317332 |
| BV711       | CD196 (CCR6)   | BioLegend #353436 |
| AF700       | CD197          | BioLegend #353244 |
| PE-Dazzle   | CCR4           | BioLegend #359420 |
| PE-Cy7      | CD279 (PD-1)   | BioLegend #621616 |

**Supplementary Table 9: T Cell Panel 2- Antibodies used**

| Color | Antigen | Company & Cat #   |
|-------|---------|-------------------|
| BV650 | CD8     | BioLegend #344730 |
| FITC  | CD25    | BioLegend #302604 |

|             |              |                   |
|-------------|--------------|-------------------|
| PE          | CD95         | BioLegend #305608 |
| PERCP-Cy5.5 | CD44 (RAT)   | BioLegend #103032 |
| APC         | CD45RA       | BioLegend #304112 |
| APC-Cy7     | CX3CR1 (RAT) | BioLegend #341616 |
| BV 605      | CD4          | BioLegend #317438 |
| BV785       | CD62L        | BioLegend #304830 |
| BV510       | CD3          | BioLegend #317332 |
| BV 711      | CD11b        | BioLegend #301344 |
| AF 700      | CD197        | BioLegend #353244 |
| PE-Dazzle   | CD45RO       | BioLegend #304248 |
| PE-Cy7      | CD27         | BioLegend #356412 |
